# Supplementary material for: Paternal factors contributing to embryo quality
Source: Springer Nature journal article supplement (doi:10.1007/s10815-018-1304-4), 2018-09-11
Supplement: MOESM1 [file 16113614]

| **-Tests used to assess Chromatin Integrity** | **Acidic**  **aniline blue**  **[AAB]** | **Toluidine**  **blue** | **Chromomycin**  **A3** | **Sperm Chromatin Dispersion (SCD)** | **in situ Nick Translation assay** | **Acridine orange test** | **TUNEL**  **assay** | **COMET**  **assay** | **Sperm Chromatin**  **Structure Assay** | **8-OHdG measurement** |
| --- | --- | --- | --- | --- | --- | --- | --- | --- | --- | --- |
| **Principle** | The AAB stain discriminates between lysine-rich histones in immature spermatozoa [take up aniline blue] and arginine/cysteine-rich protamines in mature spermatozoa [remain unchanged]. | Toluidine blue, a basic nuclear dye, that is sensitive structural probe for DNA structure and packaging. This dye stains the metachromatic and orthochromatic regions of dense chromatin. | Chromomycin A3 isa fluorochrome that competes with protamines for the binding of specific GC-rich sequence in the minor groove of DNA. | When spermatozoa with non-fragmented DNA are immersed in an agarose matrix and exposed to lysing solutions, they show the presence of extended halos of DNA dispersion due to the deproteinization of nuclei. Spermatozoa bearing fragmented DNA show a different dispersion pattern. | This assay quantifies the incorporation of biotinylated deoxyuridine triphosphate (dUTP) at single strand DNA breaks that have occurred during remodelling of the nuclear DNA in spermatozoa. | The fluorochrome AO intercalates into native double-stranded DNA as a monomer [green fluorescence] and binds to denatured single-stranded DNA [red fluorescence] as an aggregate. | The terminal deoxynucleotidyl transferase dUTP nick end labelling incorporates labelled (fluorescent) nucleotides to 3′-OH at single- and double-strand DNA breaks resulting in a fluorescent signal which can be quantified to score the spermatozoa as, ‘positive' or ‘negative'. | Similar to the SCD assay, spermatozoa are mixed with melted agarose, poured onto glass slide, lysed and subjected to horizontal electrophoresis. DNA is visualized using a DNA-specific fluorescent dye and DNA damage is quantified by measuring the displacement between the genetic material of the nucleus comet head and the resulting tail. | SCSA is a flow cytometric test where the susceptibility of sperm DNA to acid-induced DNA denaturation in situ is measured by staining with the fluorescent dye acridine orange and a flow cytometer.  The percentage of red sperm is called DNA fragmentation index (DFI) which is visualized by a histogram. | This assay measures the levels of 8-hydroxy-2-deoxyguanosine (8-OHdG), a byproduct of oxidative DNA damage in spermatozoa. |
| **Parameter Judged** | Nuclear maturity judged by DNA protein composition | DNA fragmentation | packaging quality of the chromatin and nuclear maturity judged by DNA protein composition | DNA fragmentation | DNA fragmentation and  ssDNA | DNA denaturation | DNA fragmentation | DNA fragmentation  [neutral dsDNA]  [alkaline dsDNA + ssDNA] | DNA denaturation | DNA damage |
| **Technique used** | Optical  microscopy | Optical  microscopy | Fluorescent  microscopy | Fluorescent  microscopy | Fluorescent  microscopy | Fluorescent  Microscopy and  Flow cytometry | Optical  Microscopy,  Fluorescent  Microscopy and  Flow cytometry | Fluorescent  Microscopy | Flow Cytometry | HPLC |

**Supplementary Table.1. Assays used for the assessment of sperm chromatin and DNA fragmentation.** Different assays are used to assess sperm chromatin integrity. While some of the tests employ microscopy still others use flow cytometry and HPLC.

| **Study** | **n** | **DFI**  **%** | **Assay** | **ART** | **Fertilization rate** | **Cleavage rate** | **Morula**  **formation** | **Blastocyst formation rate** | **Good embryo quality** | **Embryo quality**  **score** | **Transferred**  **embryo** | **Implantation**  **rate** | **Clinical**  **pregnancy** | **Abortion rate** |
| --- | --- | --- | --- | --- | --- | --- | --- | --- | --- | --- | --- | --- | --- | --- |
| **Zheng et al 2018** | 68 | <10 | SCD | IVF | 77.1±17.6 | - | - | 78.5±19.4 | 63.0±28.0 | - | 1.94±0.17 | 47.7 | 76.5% | 6.4% (4/63) |
| **Duarte et al 2017** | 88 | ≤16 | SCD | ICSI | 80.31±4.0 | 89.52±4.5 | - | 58.48±4.08 | 83.55±9.68 | - | - | - | - | - |
| **Zheng et al 2018** | 60 | 11-20 | SCD | IVF | 76.5±15.9 | - | - | 70.6±31.1 | 58.2±24.8 | - | 1.93±0.12 | 37.1 | 56.7% | 9.3% (4/43) |
| **Xue et al 2016** | 95 | ≤ 22.3 | SCD | ICSI | 74.9±18.6 | 97.4±6.9 | - | - | 47.0±24.6 | - | - | - | 40% | - |
| **Hagpanah et al 2016** | 10 | ≤ 30 | SCD | ICSI | 97.5±1.84 | 93.33±6.6 | 97.7±2.20 | - | - | 2.90±0.01 | - | - | - | - |
| **Duarte et al 2017** | 59 | >16 | SCD | ICSI | 78.73±4.4 | 89.44±3.3 | - | 61.68±4.48 | 90.07±2.40 | - | - | - | - | - |
| **Zheng et al 2018** | 33 | >21 | SCD | IVF | 76.4±12.1 | - | - | 50.1±9.8 | 38.9±24.1 | - | 1.94±0.23 | 20.3 | 33.3% | 15.4% (2/13) |
| **Xue et al 2016** | 40 | ≥ 22.3 | SCD | ICSI | 55.1±19.0 | 94.7±13.0 | - | - | 45.3±29.6 | - | - | - | 33% | - |
| **Hagpanah et al 2016** | 10 | > 30 | SCD | ICSI | 95.5±4.41 | 94.64±5.3 | 97.8±2.10 | - | - | 2.91±0.02 | - | - | - | - |
| **Lin et al 2008** | 21 | <9 | SCSA | ICSI | 79.04 ± 18.07 | - | - | - | 49.74 ± 23.52 | - | - | - | 46.3% (25/54) | 20.0% (5/25) |
| **Gat et al 2017** | 36 | <15 | SCSA | IVF | - | - | - | - | - | - | 1.1±0.3 | - | 17/46% | 16% (2/12) |
| **Lin et al 2008** | 68 | 9-27 | SCSA | IVF | 82.81 ± 15.58 | - | - | - | 54.15 ± 22.11 | - | - | - | 61.0% (25/41) | 4.0% (1/25) |
| **Niu et al 2011** | 235 | < 27 | SCSA | IVF | 65.9 | 97.5 | - | - | 27.5 | - | 2.0 ± 0.1 | 22.1 (88/398) | 35.7% (71/199) | 7.0% (5/71) |
| **Gat et al 2017** | 31 | 15-30 | SCSA | IVF | - | - | - | - | - | - | 1.3±0.4 | - | 30.9% (17/55) | 16% (4/24) |
| **Niu et al 2011** | 21 | >27 | SCSA | IVF | 61.4 | 98.1 | - | - | 13.2 | - | 2.1 ± 0.1 | 22.5 (9/40) | 36.8% (7/19) | 14.3% (1/7) |
| **Lin et al 2008** | 22 | >27 | SCSA | IVF | 78.55 ± 19.05 | - | - | - | 59.55 ± 21.46 | - | - | - | 56.3% (9/16) | 44.4% (4/9) |
| **Lin et al 2008** | 21 | ≥27 | SCSA | ICSI | 78.16 ± 11.22 | - | - | - | 71.11 ± 12.22 | - | - | - | 63.6% (7/11) | 28.6% (2/7) |
| **Gat et al 2017** | 21 | >30 | SCSA | IVF | - | - | - | - | - | - | 1.3±0.5 | - | 21 (12/57) | 12.5% (2/16) |
| **Sedo et al 2017** | 54 | <15 | TUNEL | ICSI | 76.1±19.4 | - | - | 59.2±22 | - | 7.6±3.8 | - | - | 74.5% | - |
| **Sedo et al 2017** | 28 | ≥15 | TUNEL | ICSI | 73.8±18.2 | - | - | 37.5±28 | - | 24.9±11.5 | - | - | 50.0% | - |
| **Total** | 1021 |  |  |  |  |  |  |  |  |  |  |  |  |  |

**Supplementary Table.2. The effect of sperm DNA fragmentation Index [DFI] and embryo quality.** As evident from the compiled data, different laboratories use different assays to study DNA fragmentation Index [DFI] in sperm before IVF/ICSI. This brings inter-laboratory result variability. The DFI cut-off also varies according to laboratories and assay employed.

| **Study** | **n** | **Fertilization**  **Rate** | **Good quality embryos** | **Embryo transfer**  **Rate** | **Cleavage** | **Blastocyst formation rate** | **Embryo transfer** | **Implantation** | **Embryo development** | **Pregnancy**  **Rate** |
| --- | --- | --- | --- | --- | --- | --- | --- | --- | --- | --- |
| **Kihaile et al 2005** | 7 | No significant change | No significant change | No significant change | No significant change | No significant change | - | No significant change | No significant change | No significant change |
| **Peterlin et al 2002** | 3 | No significant change | No significant change | No significant change | - | - | - | - | - | - |
| **Choi et al 2004** | 12 | No significant change | - | - | - | - | No significant change | - | - | No significant change |
| **Sen et al 2015** | 10 | No significant change | No significant change | No significant change | - | - | - | - | - | No significant change |
| **Beyaz**  **et al 2017** | 58 | - | - | - | - | - | - | - | No significant change | No significant change |
| **Liu et al 2017** | 12 | Decreased | No significant change | - | No significant change | No significant change | - | No significant change | - | No significant change |
| **Zhu et al 2015** | 61 | Decreased | No significant change | - | - | - | No significant change | No significant change | - | No significant change |
| **Tanaka et al 2015** | 15 | - | - | - | No significant change | - | - | - | - | No significant change |
| **Liu et al 2013** | 143 | Decreased | No significant change | - | Decreased | - | No significant change | No significant change | - | No significant change |
| **Van Golde 2001** | 8 | Decreased | Decreased | - | - | - | - | No significant change | - | No significant change |
| **Choi et al 2012** | 110 | - | - | - | - | - | - | - | - | - |
| **Sasamine et al 2015** | 15 | - | Decreased | - | - | No significant change | - | - | - | No significant change |
| **Total** | 454 |  |  |  |  |  |  |  |  |  |

**Supplementary Table.3. Y chromosome microdeletions and embryo quality.** Compiled data suggests that presence of Y chromosome microdeletions can affect the fertilization rate of sperm and quality of embryos while other parameters of embryo quality do not seem to be affected.
